# Supplementary material for: Impaired oxygen-sensitive regulation of mitochondrial biogenesis within the von Hippel–Lindau syndrome
Source: PubMed Central journal article supplement (PMC9236906; doi:10.1038/s42255-022-00593-x), 2022-06-27

Fig. 3

Fig. 3a

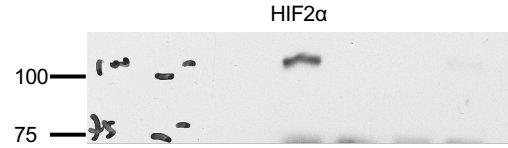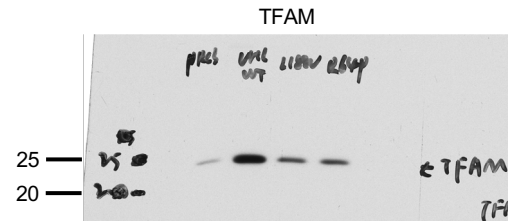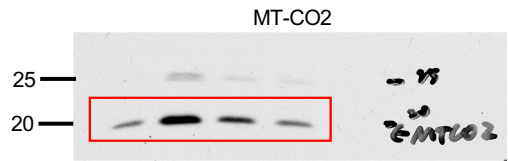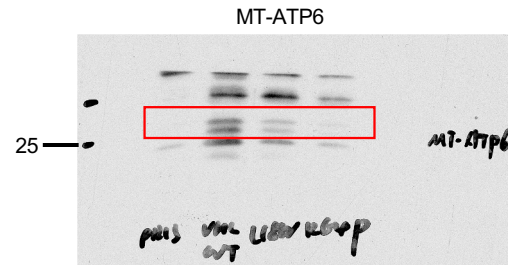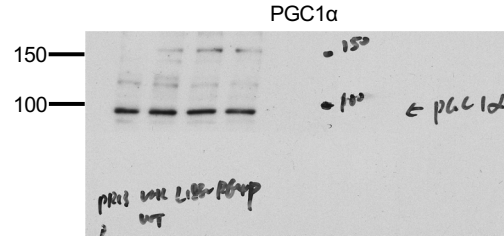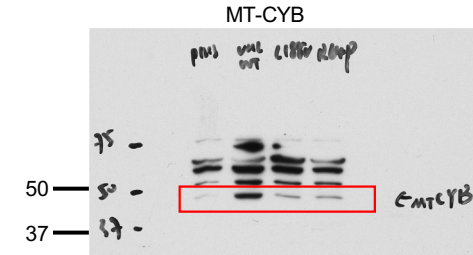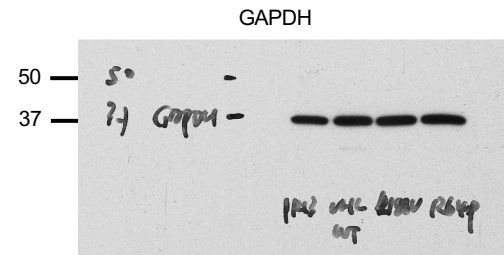

Fig. 3b

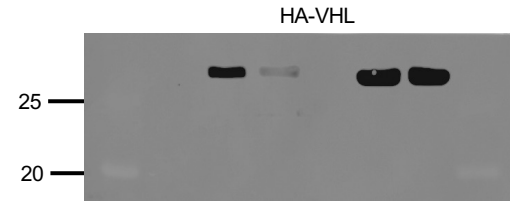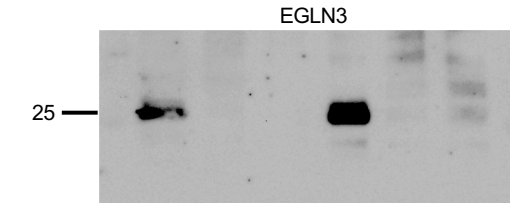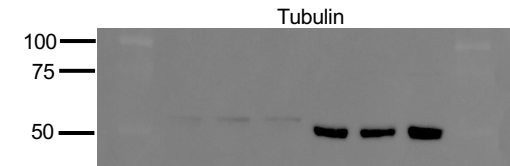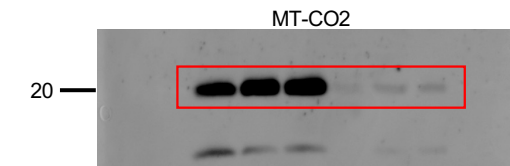

Fig. 3c

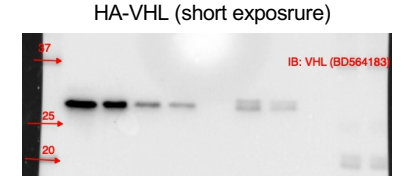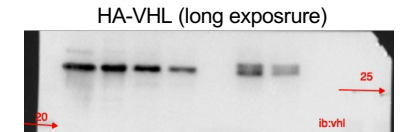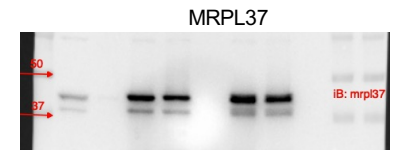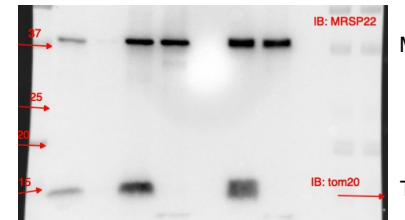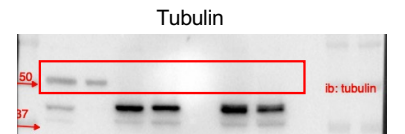

Fig. 3

Fig. 3f

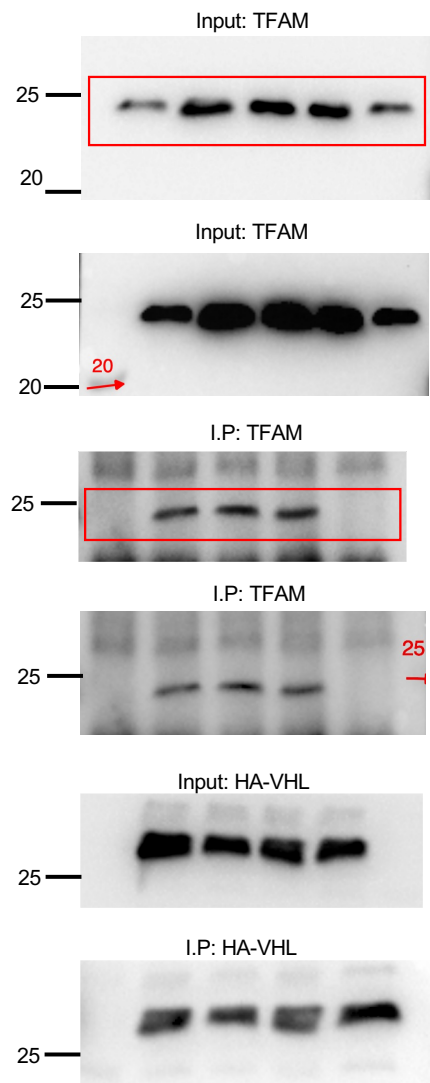

Fig. 3g

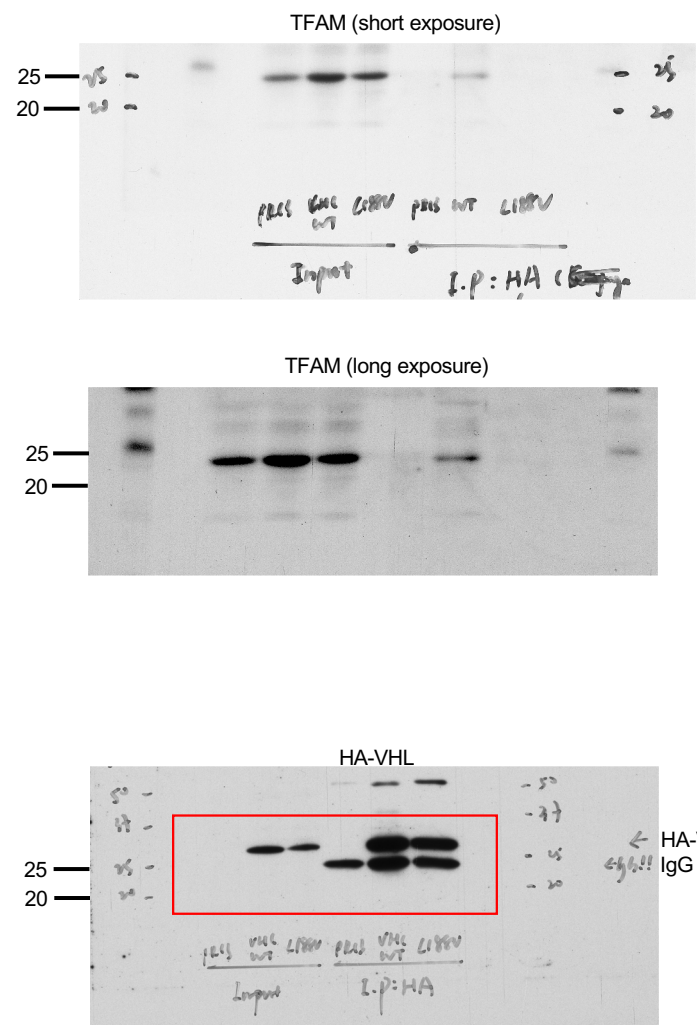

Fig. 3h

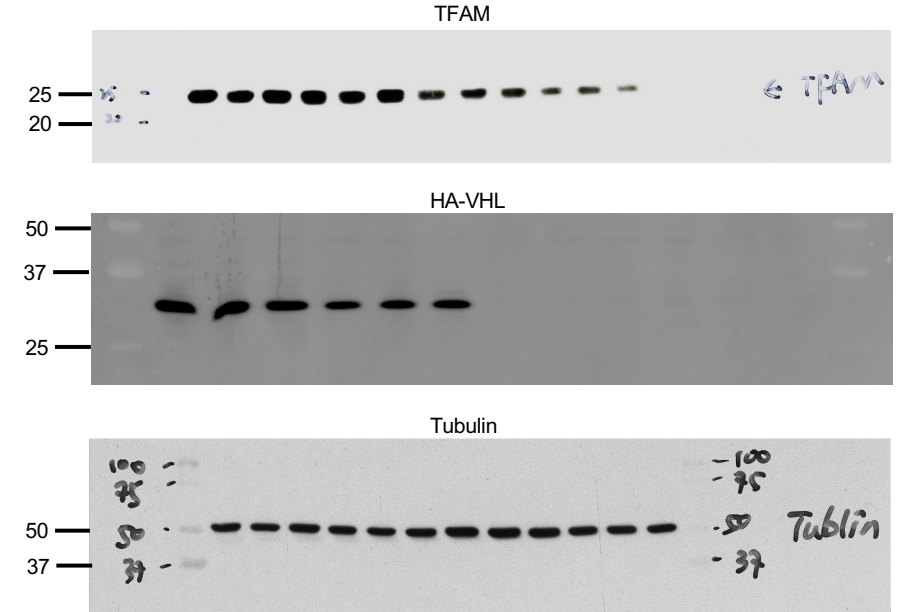

Fig. 3i

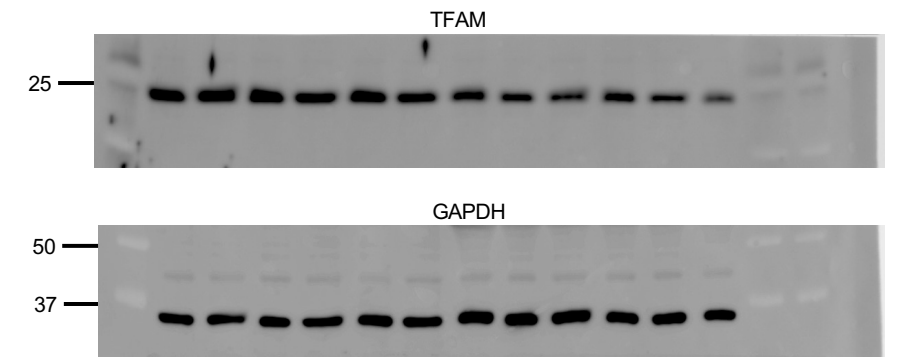

Supplement: 42255_2022_593_MOESM9_ESM.pdf [file 42255_2022_593_MOESM9_ESM.pdf]
