# Supplementary material for: Impaired oxygen-sensitive regulation of mitochondrial biogenesis within the von Hippel–Lindau syndrome
Source: PubMed Central journal article supplement (PMC9236906; doi:10.1038/s42255-022-00593-x), 2022-06-27
Supplement: 42255_2022_593_MOESM1_ESM.pdf [file 42255_2022_593_MOESM1_ESM.pdf]

**Supplementary information**

---

**Impaired oxygen-sensitive regulation of mitochondrial biogenesis within the von Hippel–Lindau syndrome**

---

In the format provided by the authors and unedited

## Supplementary Information

### Impaired oxygen-sensitive regulation of mitochondrial biogenesis within the von Hippel-Lindau syndrome.

Shuijie Li<sup>1,2§</sup>, Wenyu Li<sup>1\*</sup>, Juan Yuan<sup>1\*</sup>, Petra Bullova<sup>1</sup>, Jieyu Wu<sup>1</sup>, Xuepei Zhang<sup>3</sup>, Yong Liu<sup>3</sup>, Monika Plescher<sup>1</sup>, Javier Rodriguez<sup>4</sup>, Oscar C. Bedoya-Reina<sup>1</sup>, Paulo R. Jannig<sup>5</sup>, Paula Valente-Silva<sup>5</sup>, Meng Yu<sup>6</sup>, Marie Arsenian Henriksson<sup>1</sup>, Roman A. Zubarev<sup>3</sup>, Anna Smed Sörensen<sup>6</sup>, Carolyn K. Suzuki<sup>7</sup>, Jorge L. Ruas<sup>5</sup>, Johan Holmberg<sup>8</sup>, Catharina Larsson<sup>9</sup>, C. Christofer Juhlin<sup>9</sup>, Alex von Kriegsheim<sup>4</sup> and Yihai Cao<sup>1</sup>, Susanne Schlisio<sup>1§</sup>

<sup>1</sup>Department of Microbiology, Tumor and Cell Biology, Karolinska Institutet, Stockholm, Sweden

<sup>2</sup>College of Pharmacy, Harbin Medical University, Harbin, 150081 China

<sup>3</sup>Department of Medical Biochemistry and Biophysics, Stockholm, Sweden

<sup>4</sup>Edinburgh Cancer Research Centre, IGMM, University of Edinburgh, Edinburgh, UK

<sup>5</sup>Department of Physiology and Pharmacology, Karolinska Institutet, Stockholm, Sweden

<sup>6</sup>Department of Medicine, Karolinska University Hospital, Stockholm; Sweden

<sup>7</sup>Department of Biochemistry and Molecular Biology, New Jersey Medical School, University of Medicine and Dentistry of New Jersey, Newark, NJ 07103, USA

<sup>8</sup>Department of Molecular Biology, Faculty of Medicine, Umeå University, Umeå, Sweden.

<sup>9</sup>Department of Oncology-Pathology, Karolinska Institutet, Karolinska University Hospital, SE-17176 Stockholm, Sweden

\* These authors contributed equally to this work

§ Corresponding authors: Shuijie Li (shuijie.li@ki.se), Susanne Schlisio (susanne.schlisio@ki.se)

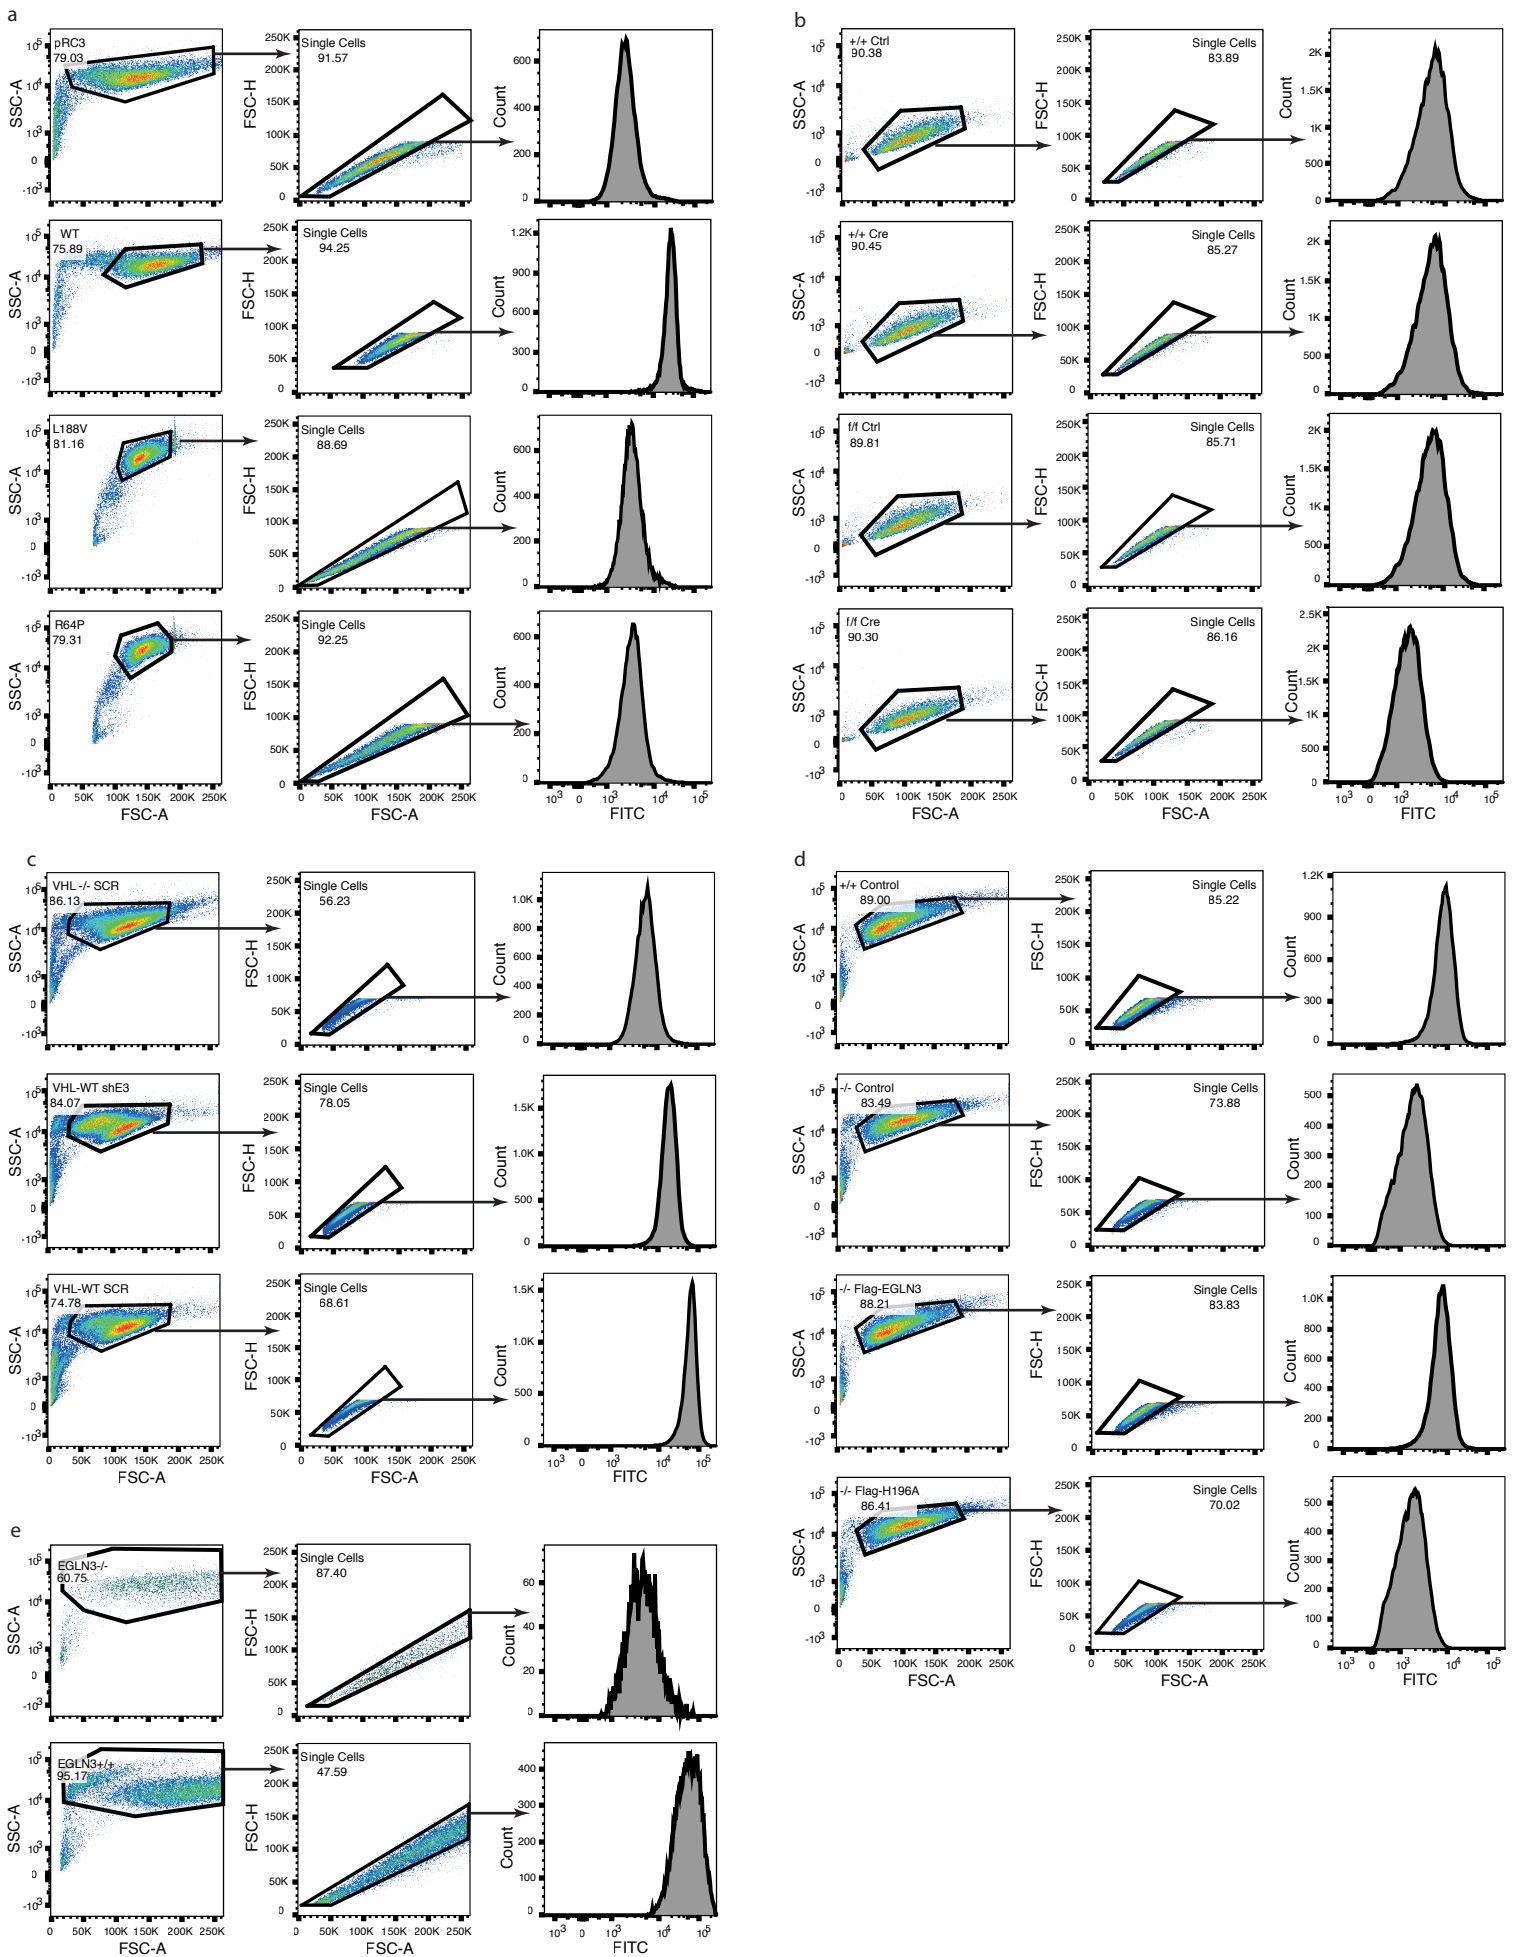

Supplementary Figure 2

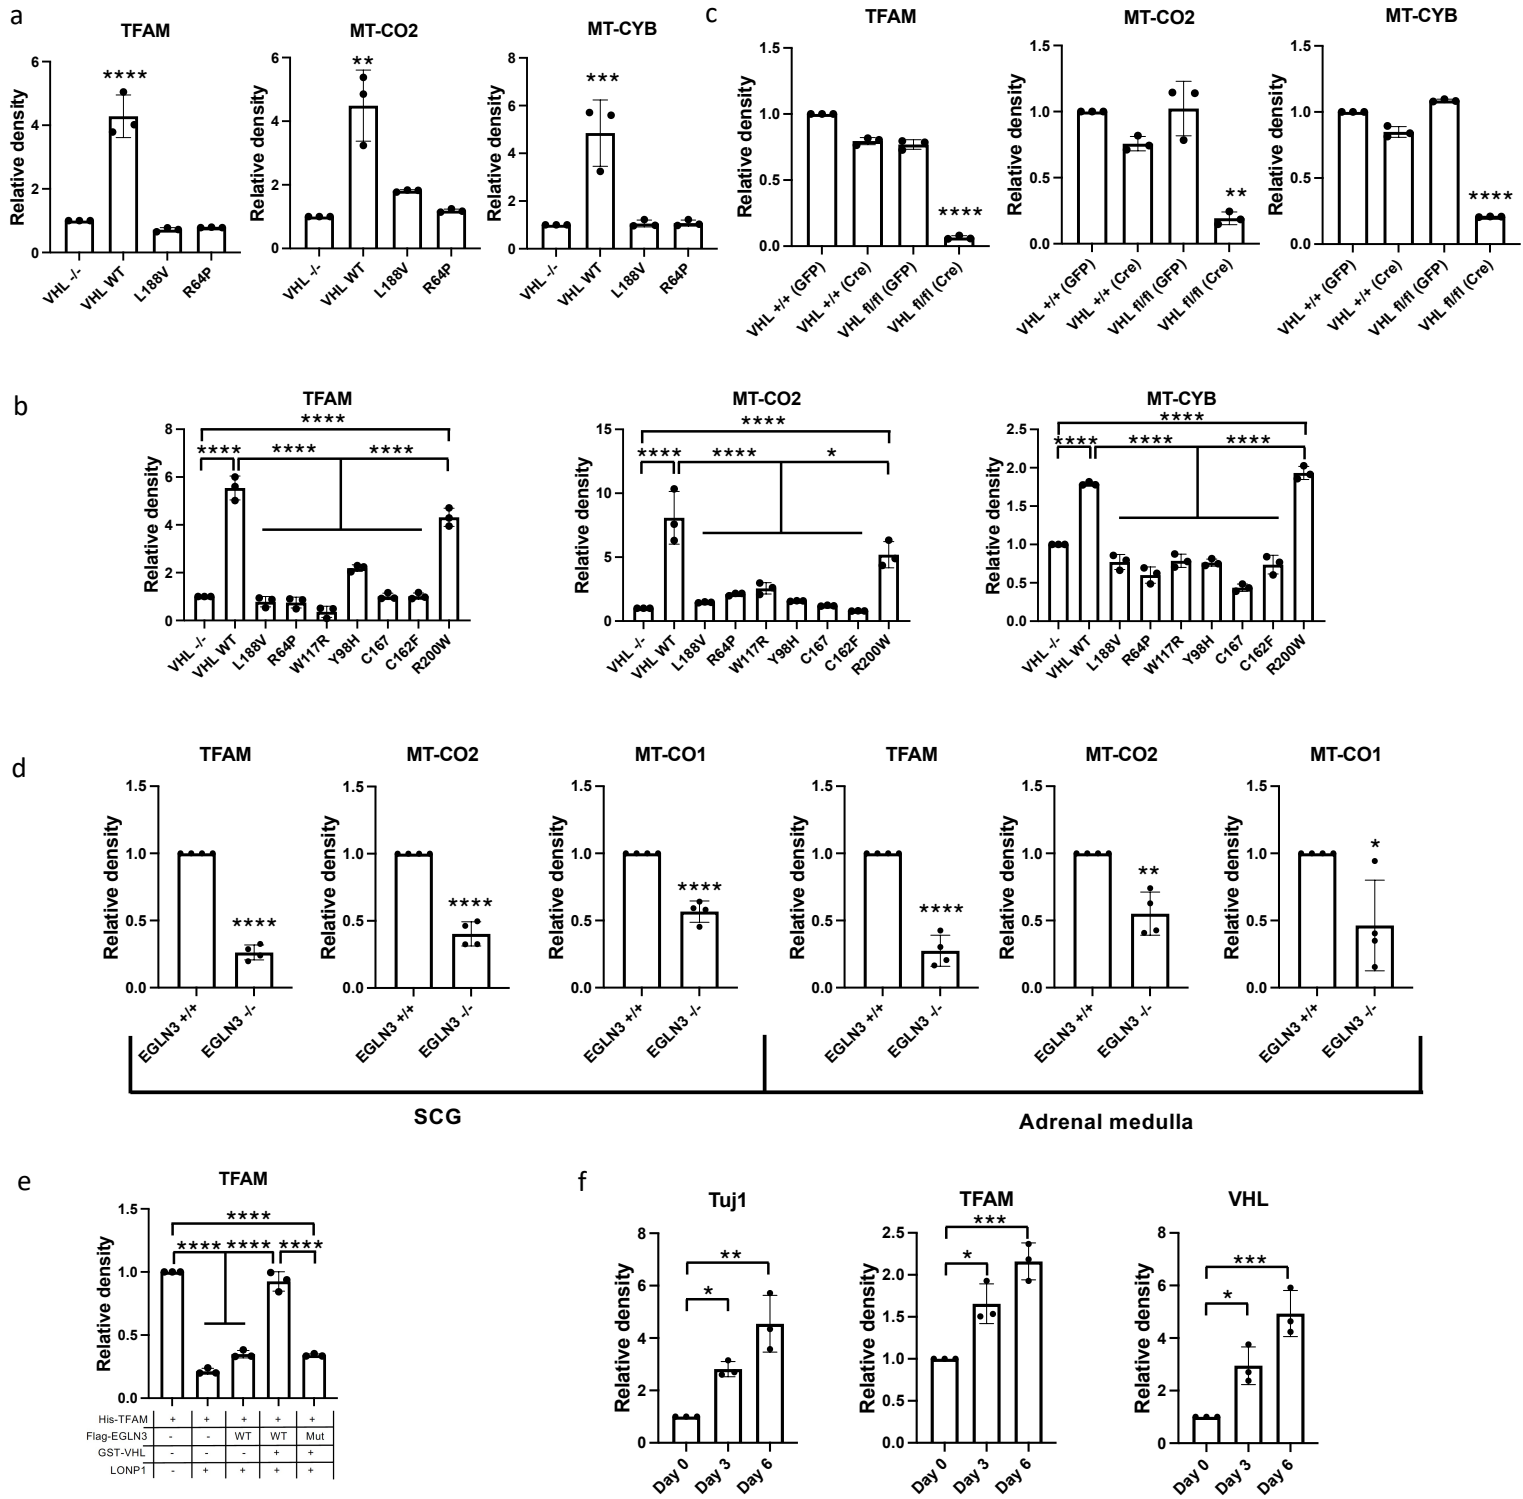

Supplementary Figure 2: Quantification of western blots.

a (Fig. 1e), b (Fig. 1i), c (Fig. 1j), e (Fig. 5g), f (Fig. 7b): Data are presented as mean values  $\pm$  SD. Error bars show standard deviations (SD). One way ANOVA Tukey's Multiple Comparison Test. \*\*\*\*  $p < 0.0001$ , \*\*\*  $p < 0.001$ , \*\*  $p < 0.01$ , \*  $p < 0.05$ . a (Fig. 1e):  $p = 0.0017$ ,  $p = 0.0008$ . b (Fig. 1i):  $p = 0.0147$ . c (Fig. 1j): \*\*  $p = 0.001$ . e (Fig. 5g): \*\*\*\*  $p < 0.0001$ .

f (Fig. 7b):  $p = 0.0325$ ,  $p = 0.0013$ ;  $p = 0.012$ ,  $p = 0.0007$ ;  $p = 0.0253$ ,  $p = 0.0008$ .

d (Fig. 2e): Data are presented as mean values  $\pm$  SD. Error bars show standard deviations (SD). Two-tailed unpaired  $t$  test. \*\*\*\*  $p < 0.0001$ , \*\*  $p = 0.0014$ , \*  $p = 0.0191$ .
