# Supplementary material for: Impaired oxygen-sensitive regulation of mitochondrial biogenesis within the von Hippel–Lindau syndrome
Source: PubMed Central journal article supplement (PMC9236906; doi:10.1038/s42255-022-00593-x), 2022-06-27

Fig. 2

Fig. 2a

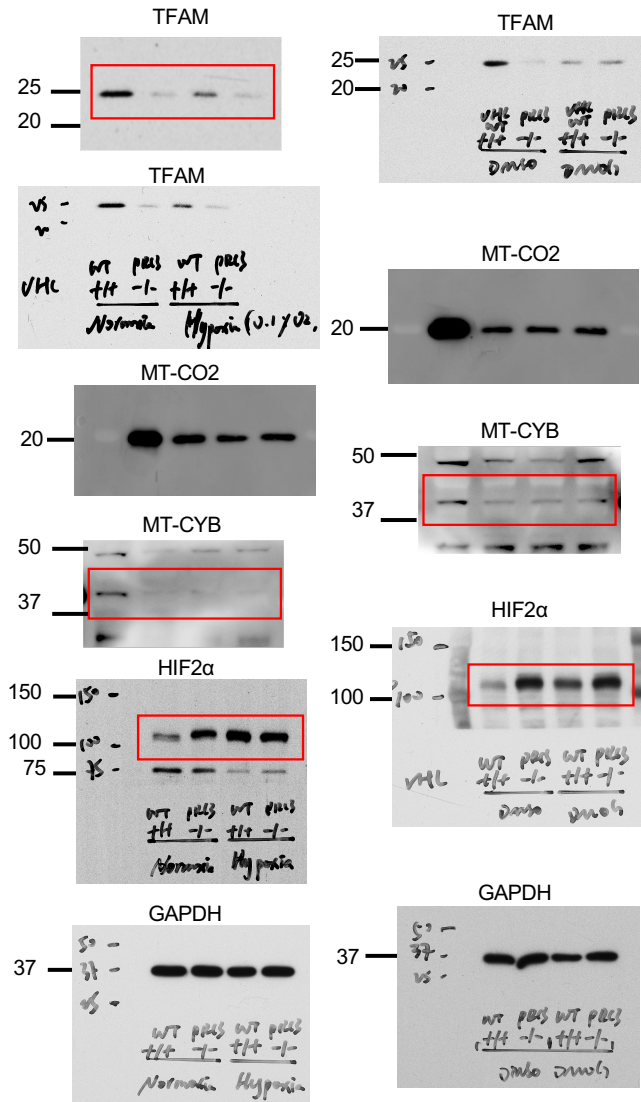

Fig. 2b

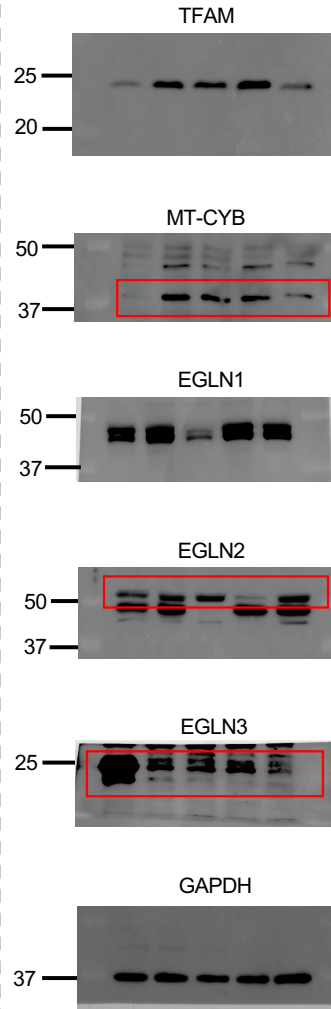

Fig. 2e

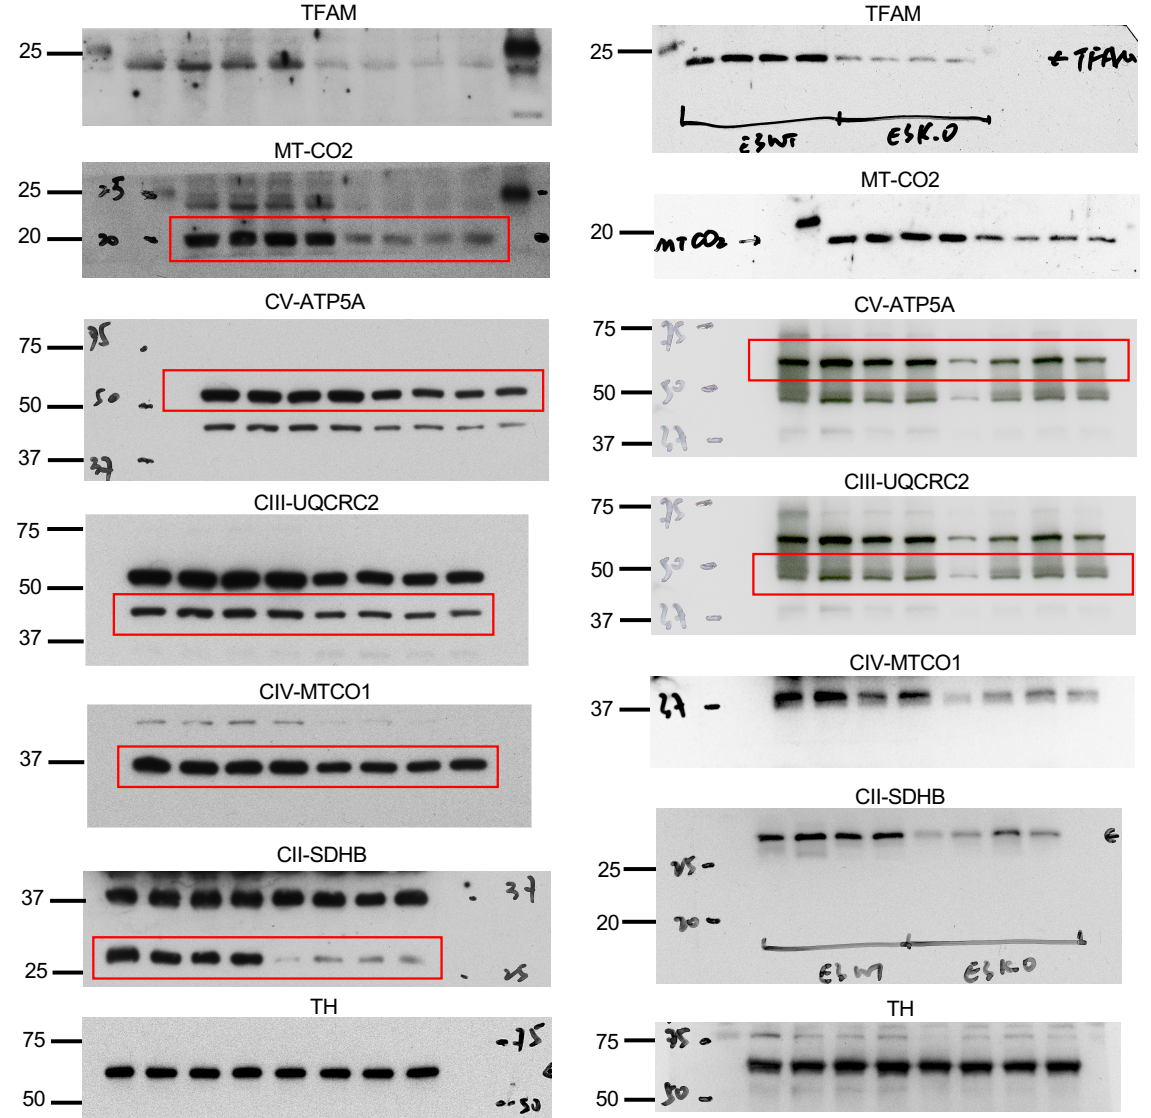

Fig. 2

Fig. 2f

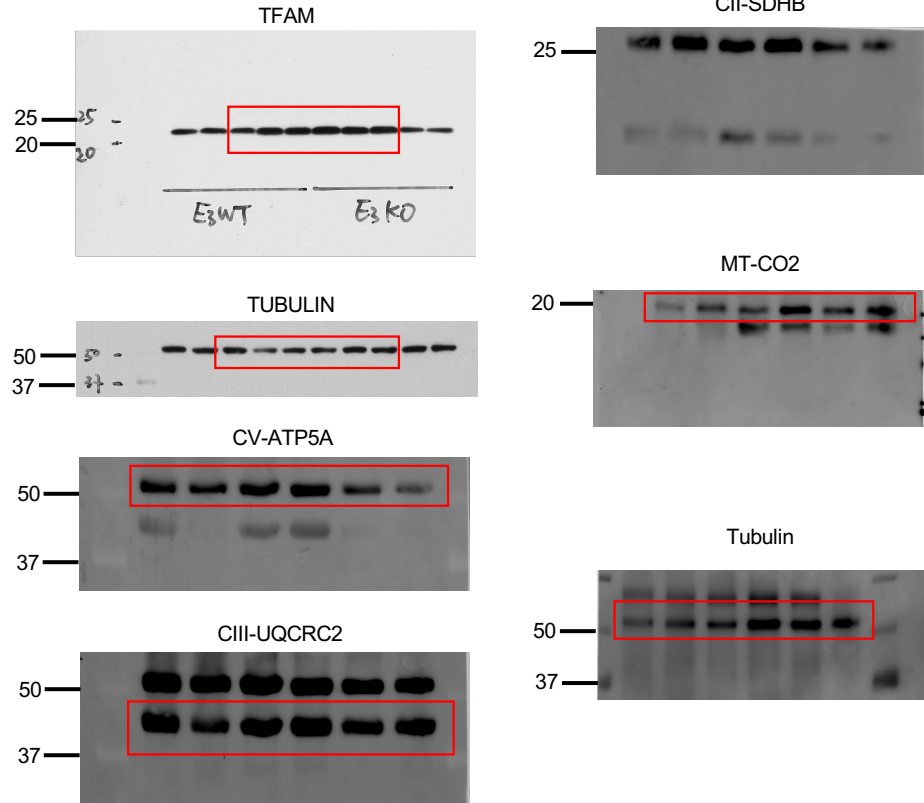

Fig. 2h

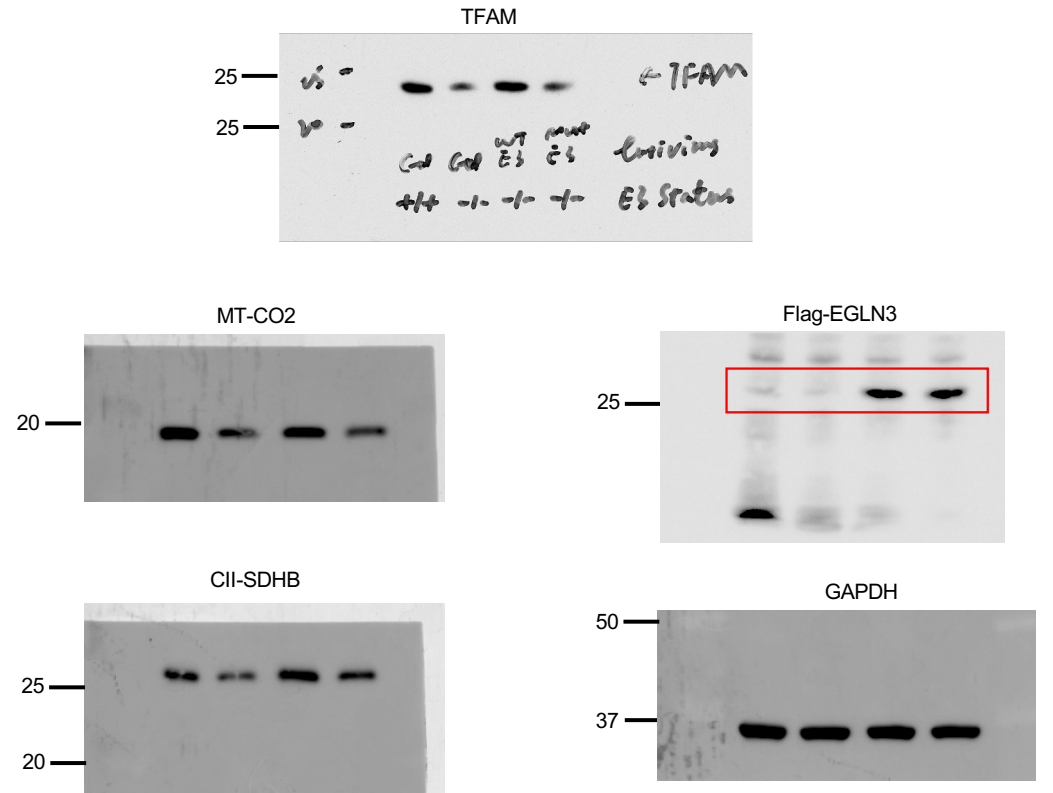

Supplement: 42255_2022_593_MOESM7_ESM.pdf [file 42255_2022_593_MOESM7_ESM.pdf]
