# Supplementary material for: Impaired oxygen-sensitive regulation of mitochondrial biogenesis within the von Hippel–Lindau syndrome
Source: PubMed Central journal article supplement (PMC9236906; doi:10.1038/s42255-022-00593-x), 2022-06-27

Fig. 4

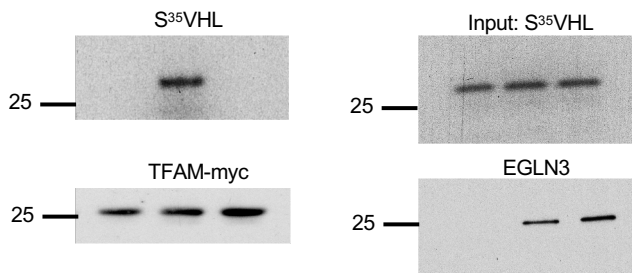

Fig. 4a

Fig. 4b

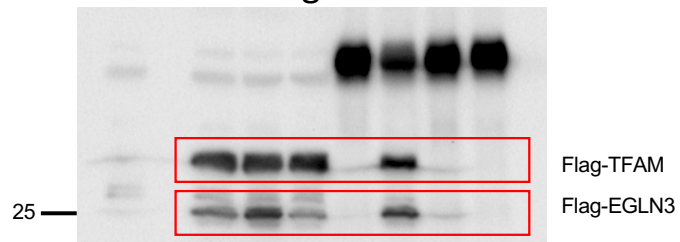

Fig. 4d

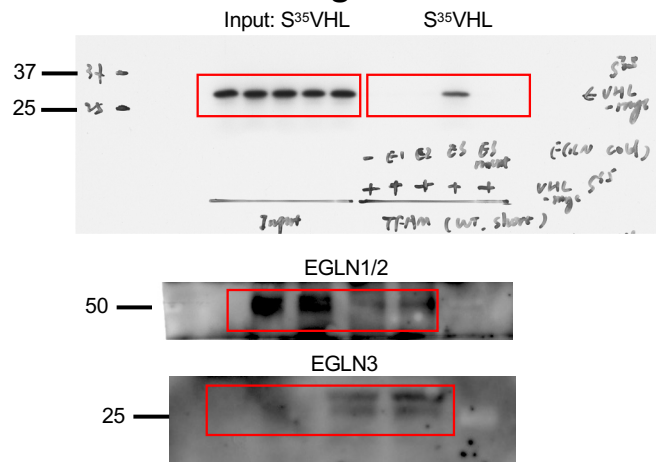

Fig. 4g

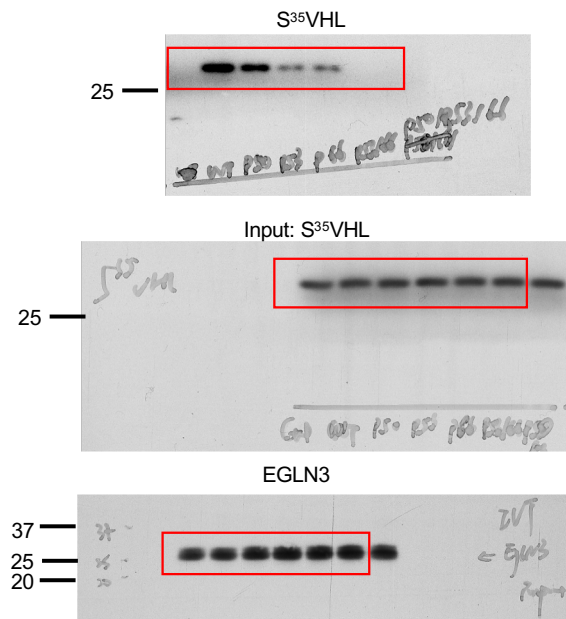

Fig. 4h

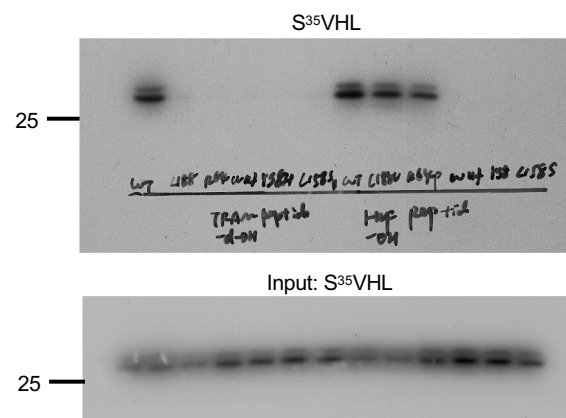

Fig. 4i

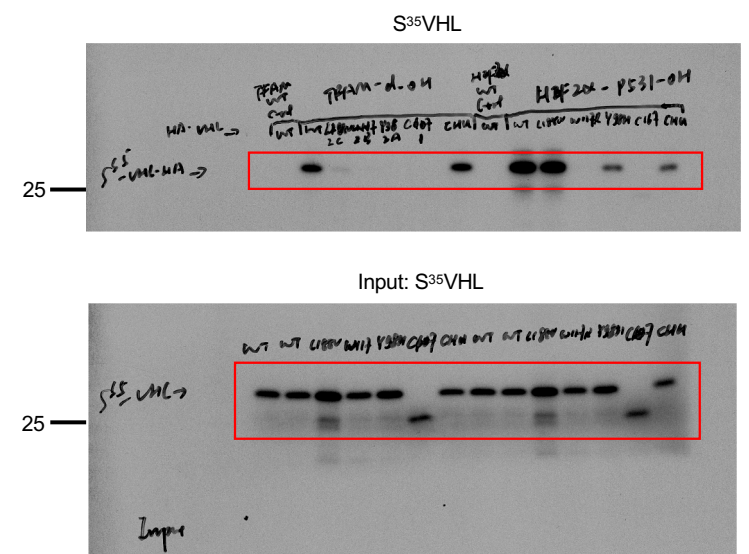

Fig. 4j

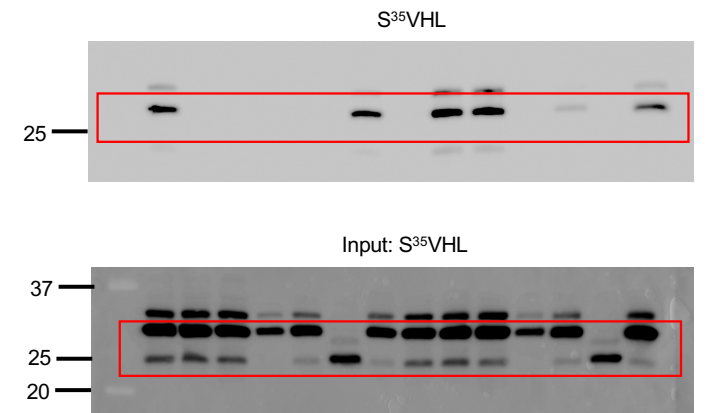

Supplement: 42255_2022_593_MOESM11_ESM.pdf [file 42255_2022_593_MOESM11_ESM.pdf]
