# Supplementary material for: Impaired oxygen-sensitive regulation of mitochondrial biogenesis within the von Hippel–Lindau syndrome
Source: PubMed Central journal article supplement (PMC9236906; doi:10.1038/s42255-022-00593-x), 2022-06-27

Fig. 5

Fig. 5a

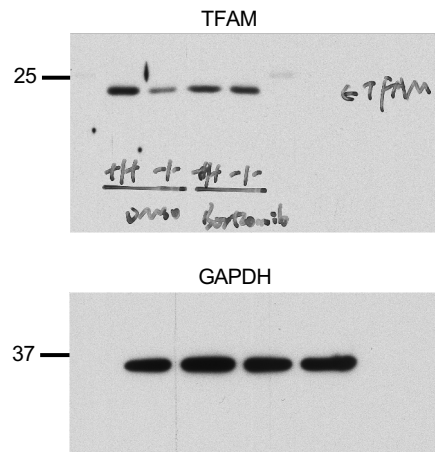

Fig. 5b

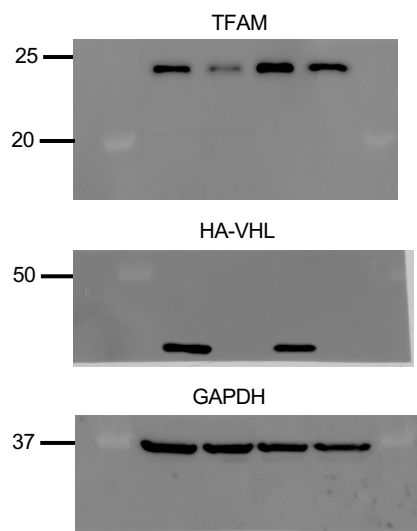

Fig. 5c

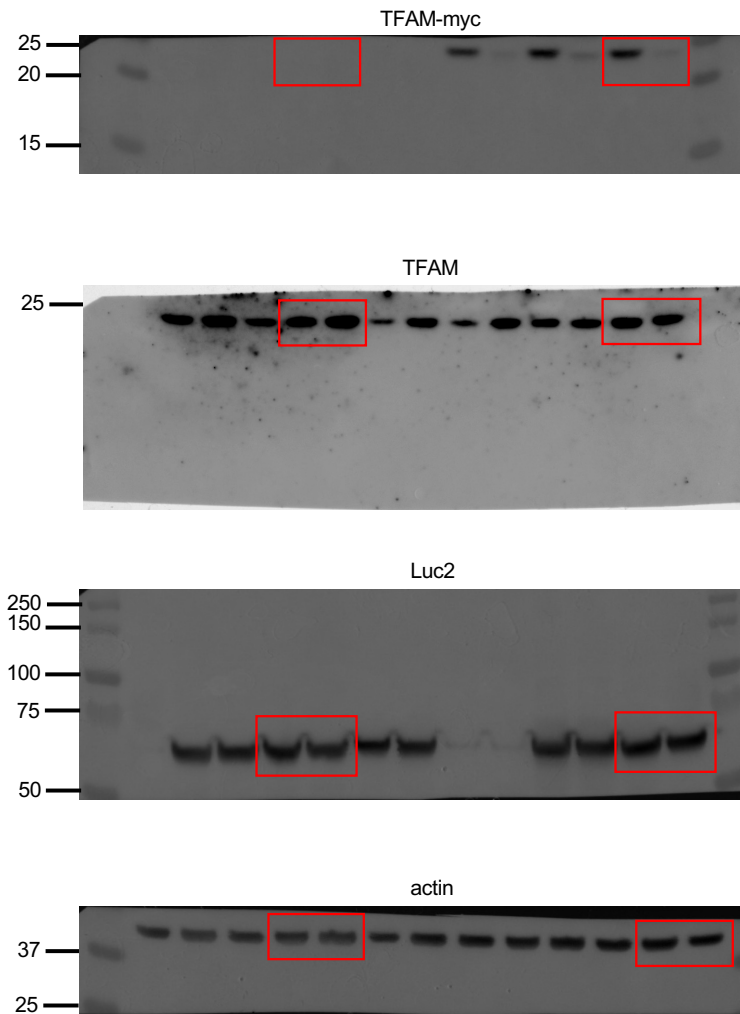

Fig. 5d

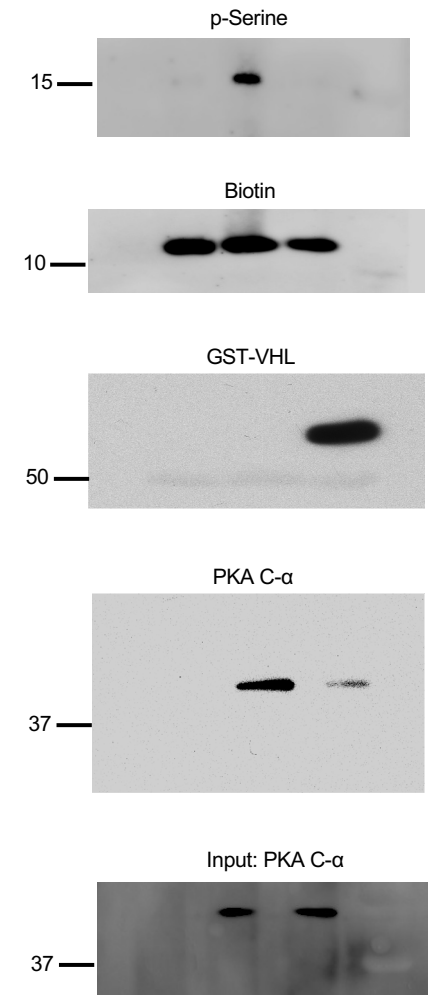

Fig. 5

Fig. 5e

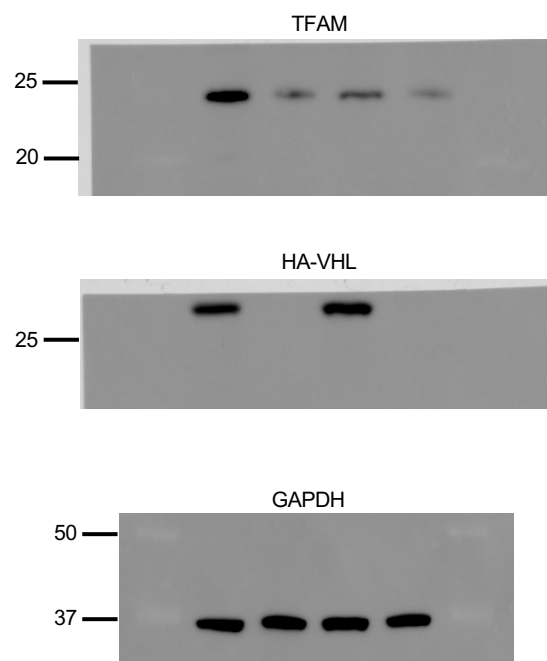

Fig. 5f

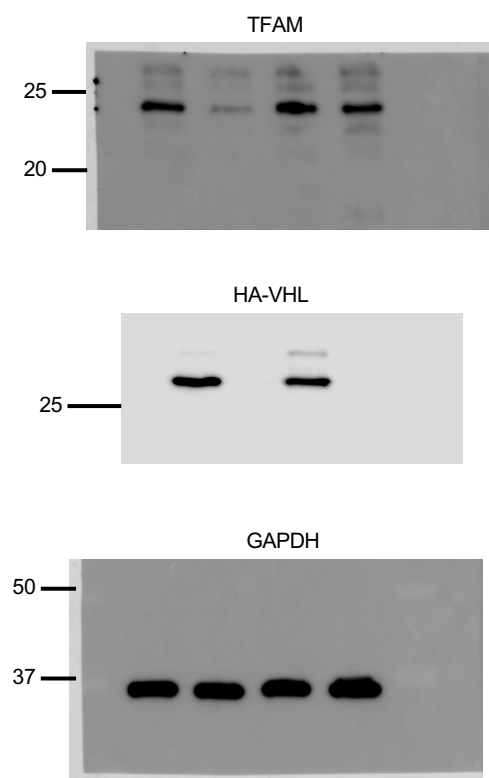

Fig. 5g

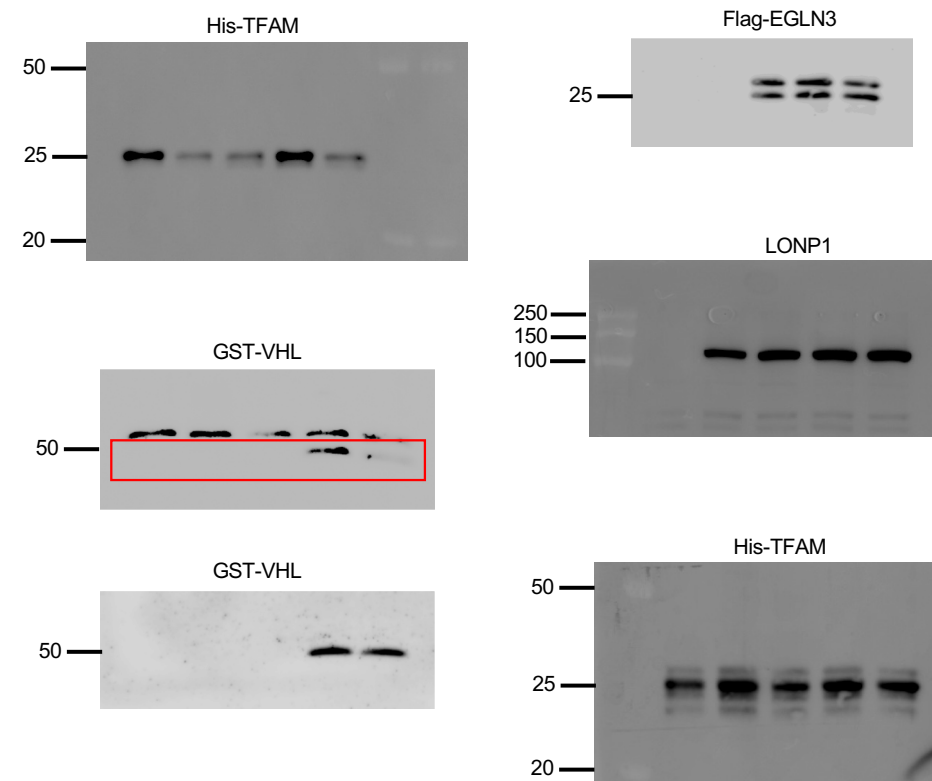

Supplement: 42255_2022_593_MOESM12_ESM.pdf [file 42255_2022_593_MOESM12_ESM.pdf]
