# Supplementary material for: Impaired oxygen-sensitive regulation of mitochondrial biogenesis within the von Hippel–Lindau syndrome
Source: PubMed Central journal article supplement (PMC9236906; doi:10.1038/s42255-022-00593-x), 2022-06-27

Extended Data Fig. 4

a

Flag-TFAM

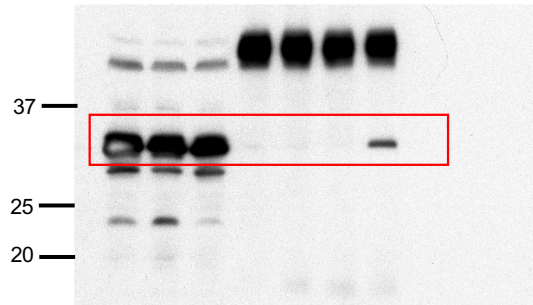

Flag-TFAM

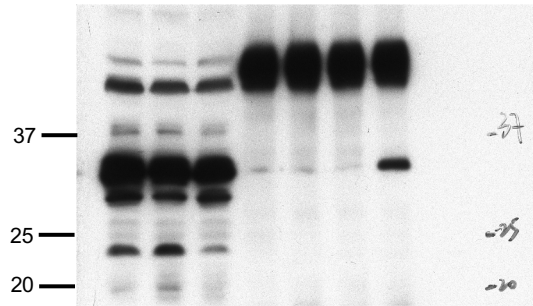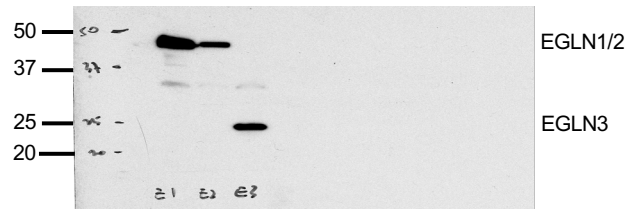

h

S<sup>35</sup>VHL

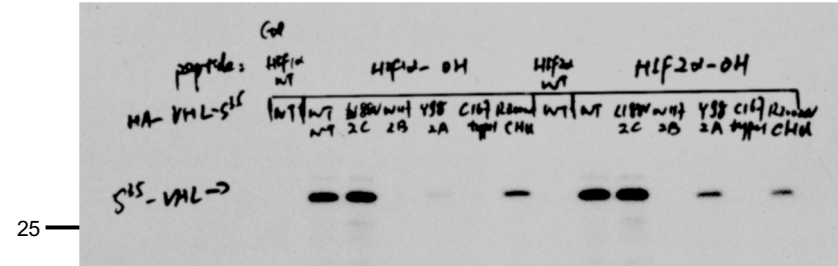

Input S<sup>35</sup>VHL

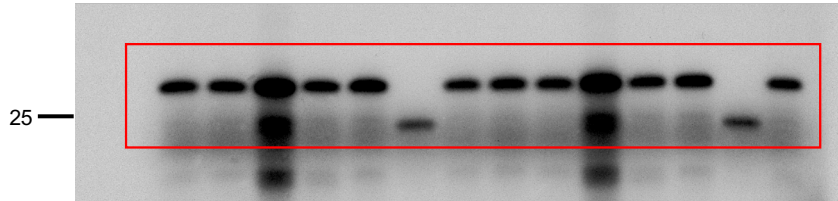

i

HA-VHL

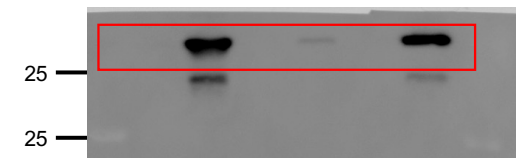

GAPDH

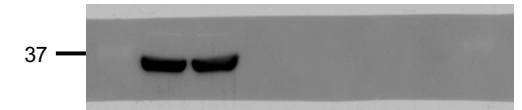

Biotin

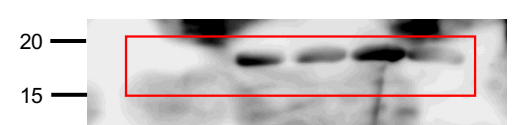

Supplement: 42255_2022_593_MOESM20_ESM.pdf [file 42255_2022_593_MOESM20_ESM.pdf]
